# Supplementary material
Source: publisher figshare collection journal article supplement (https://karger.figshare.com/ndownloader/files/36506211)
Supplement: Supplementary file 1 [file 36506211]

Supplementary Table 1: Comparison for RAVLT, DST and N BACK

| Scores | G1= Normal hearing(N=75) | | | G2 =Normal hearing with tinnitus(N=75) | | | Z value | p-value |
| --- | --- | --- | --- | --- | --- | --- | --- | --- |
|  | | |  | | |
| Mean | S.D | Mean Rank | Mean | S.D | Mean Rank |
| **VERBAL MEMORY (RAVLT)** | | | | | | | | |
| Total words recalled in 5 trials | 52.86 | 7.69 | 85.13 | 48.72 | 9.47 | 65.87 | 2.71 | **0.007** |
| Immediate recall | 11.74 | 2.05 | 86.61 | 10.34 | 2.66 | 64.39 | 3.15 | **0.002** |
| Delayed recall | 12.21 | 1.67 | 91.78 | 10.48 | 2.32 | 59.22 | 4.63 | **0.001** |
| Hits recognition | 14.70 | 0.56 | 81.98 | 14.34 | 0.95 | 69.02 | 2.22 | **0.02** |
| Omissions | 0.307 | 0.59 | 69.20 | 0.64 | 0.92 | 81.80 | 2.15 | **0.03** |
| Commissions | 0.29 | 0.56 | 70.92 | 0.50 | 0.86 | 80.08 | 1.60 | 0.10 |
| **AUDITORY ATTENTION (DIGIT SPAN TEST)** | | | | | | | |  |
| DFST | 7.73 | 1.70 | 76.97 | 7.68 | 2.09 | 74.03 | 0.420 | 0.67 |
| DBST | 5.14 | 2.11 | 83.38 | 4.44 | 2.03 | 67.62 | 2.256 | **0.02** |
| Total score | 12.88 | 3.32 | 81.62 | 12.12 | 3.55 | 69.38 | 1.73 | 0.08 |
| **WORKING MEMORY (N BACK TEST)** | | | | | | | |  |
| 1 Back hit | 8.96 | 0.19 | 88.60 | 8.52 | 0.70 | 62.40 | 5.185 | **0.001** |
| 1 Back error | 0.080 | 0.27 | 62.60 | 0.61 | 0.91 | 88.40 | 4.83 | **0.001** |
| 2 Back hit | 7.64 | 0.95 | 96.36 | 6.44 | 1.15 | 54.64 | 6.06 | **0.001** |
| 2 Back error | 1.52 | 1.04 | 55.71 | 2.89 | 1.49 | 95.29 | 5.72 | **0.001** |
